# Supplementary material for: Connecting the dots on health inequalities – a systematic review on the social determinants of health in Portugal
Source: Springer Nature journal article supplement (doi:10.1186/s12939-016-0314-z), 2016-02-15
Supplement: MOESM1 [file 9762848]

## Additional File 1: Search Strategy

The PROGRESS framework was used as an initial framework to ensure the main determinants of socioeconomic health inequalities were covered in the search strategy. From each term of this framework (first column of table 1), the closest MeSH terms were identified (second column of table 1 and corresponding entry terms in the third column). The MeSH terms in Table 1 were all included in the search as a Major Topic and connected by an "OR" Boolean operator. This search was performed with the term "Portug\*", connected by an "AND" operator.

To make sure articles not focusing exclusively on Portugal were included, a second search was performed by looking for the term "Portug\*" in all fields and adding other terms referring to international comparisons. The following chart schematizes these two searches:

| Search 1      | Search 2                                                                                                                                                                  |
|---------------|---------------------------------------------------------------------------------------------------------------------------------------------------------------------------|
| Table 1, (A)  | Table 1, (A)                                                                                                                                                              |
| AND           | AND                                                                                                                                                                       |
| Portug*[MeSH] | Portug*[All Fields]                                                                                                                                                       |
|               | AND                                                                                                                                                                       |
|               | (international[All Fields] AND comparison\$[All Fields]) OR<br>(european[All Fields] AND comparison\$[All Fields]) OR<br>(european[All Fields] AND countries[All Fields]) |

Both searches were restricted to articles published after January 1<sup>st</sup> 2000 in English or Portuguese.

Using the MeSH terms (and corresponding entry terms) as a starting point, the most appropriate terms for Web of Science and Scopus were then selected (fourth and fifth columns of table 1). This selection excluded terms that did not apply to the Portuguese context (such as "Minority Health and Health Disparities Research and Education Act of 2000") and terms that were felt would amplify the search too much to little or no gain (such as "domicile").

In both Web of Science and Scopus, these terms were searched for in the title, abstract or keywords of the publications. They were all included and connected by the "OR" operator. All databases in both aggregators were used and were limited to publications written in English or Portuguese published after January 1<sup>st</sup> 2000.

In Web of Science it is not possible to search for a term in all fields of a publication.

Therefore, a search for publications on country comparisons retrieved an high amount of papers, many of which did not include Portugal. Thus, only two searches were performed in this aggregator, on articles focusing on Portugal:

| Search 1     | Search 2           |
|--------------|--------------------|
| Table 1, (B) | Table 1, (C)       |
| AND          | AND                |
| Portug*      | Portug*            |
| AND          | AND                |
| health*      | "saúde" OR "saud*" |

Finally four searches were performed on Scopus:

| Search 1     | Search 2                                                                        | Search 3           | Search 4                                                                 |
|--------------|---------------------------------------------------------------------------------|--------------------|--------------------------------------------------------------------------|
| Table 1, (B) | Table 1, (B)                                                                    | Table 1, (C)       | Table 1, (C)                                                             |
| AND          | AND                                                                             | AND                | AND                                                                      |
| Portug*      | "international comparison\$" OR "european comparison\$" OR "european countries" | Portug*            | "comparaç* internaciona*" OR "comparaç* europeia\$" OR "países europeus" |
| AND          | AND                                                                             | AND                | AND                                                                      |
| health*      | health*                                                                         | "saúde" OR "saud*" | "saúde" OR "saud*"                                                       |
|              | AND                                                                             |                    | AND                                                                      |
|              | Portug*                                                                         |                    | Portug*                                                                  |

| PROGRESS Framework |                                       | MESH terms (A)                | MESH Entry terms                                                                                                                       | Web of Science / Scopus (English) (B)                                                                                                                 | Web of Science / Scopus (Portuguese) (C)                                                                                                         |
|--------------------|---------------------------------------|-------------------------------|----------------------------------------------------------------------------------------------------------------------------------------|-------------------------------------------------------------------------------------------------------------------------------------------------------|--------------------------------------------------------------------------------------------------------------------------------------------------|
| P                  | Place of residence                    | Residence Characteristics     | Domicile<br>Residential selection<br>Neighborhood<br>Place of birth / Birth place<br>Community<br>Living arrangements                  | "Poverty area\$"<br>"Slum\$"<br>"Ghetto\$"<br>"Rural health"<br>"Urban health"<br>"Suburban health"<br>"Context*"<br>"Place of birth"<br>"Birthplace" | "Desigualdade\$ geográfica\$"<br>"Disparidade\$ geográfica\$"<br>"Gueto\$"<br>"Saúde rural"<br>"Saúde urbana"<br>"Saúde suburbana"<br>"Context*" |
|                    |                                       | Poverty areas                 | Slum<br>Ghetto                                                                                                                         |                                                                                                                                                       |                                                                                                                                                  |
|                    |                                       | Rural population              | Rural Spatial Distribution Rural Community                                                                                             |                                                                                                                                                       |                                                                                                                                                  |
|                    |                                       | Rural health                  |                                                                                                                                        |                                                                                                                                                       |                                                                                                                                                  |
|                    |                                       | Urban population              | Urban Spatial Distribution                                                                                                             |                                                                                                                                                       |                                                                                                                                                  |
|                    |                                       | Urban health                  |                                                                                                                                        |                                                                                                                                                       |                                                                                                                                                  |
|                    |                                       | Suburban population           | Nonmetropolitan Population<br>Suburbanization                                                                                          |                                                                                                                                                       |                                                                                                                                                  |
|                    |                                       | Suburban health               |                                                                                                                                        |                                                                                                                                                       |                                                                                                                                                  |
| R                  | Race / ethnicity / culture / language | Continental Population Groups | Racial Stock<br>Race                                                                                                                   | "Race\$"<br>"Ethnic group\$"<br>"Nationalit*"<br>"Migrant\$"<br>"Emigrant\$"<br>"Immigrant\$"<br>"Minority group\$"<br>"Minority health"              | "Raça\$"<br>"Etnia\$"<br>"Nacionalidade\$"<br>"Migrante\$"<br>"Emigrante\$"<br>"Imigrante\$"<br>"Minoria\$"                                      |
|                    |                                       | Ethnic groups                 | Nationality                                                                                                                            |                                                                                                                                                       |                                                                                                                                                  |
|                    |                                       | Culture                       | Custom<br>Belief<br>Cultural background                                                                                                |                                                                                                                                                       |                                                                                                                                                  |
|                    |                                       | Language                      |                                                                                                                                        |                                                                                                                                                       |                                                                                                                                                  |
|                    |                                       | Transients and Migrants       | Migrant Workers<br>Nonmigrant<br>Squatter<br>Illegal migrant<br>Nomad                                                                  |                                                                                                                                                       |                                                                                                                                                  |
|                    |                                       | Emigrants and Immigrants      | Foreigner<br>Alien                                                                                                                     |                                                                                                                                                       |                                                                                                                                                  |
|                    |                                       | Minority groups               |                                                                                                                                        |                                                                                                                                                       |                                                                                                                                                  |
|                    |                                       | Minority health               | Minority Health and Health Disparities<br>Research and Education Act of 2000                                                           |                                                                                                                                                       |                                                                                                                                                  |
| O                  | Occupation                            | Occupations                   | Vocation                                                                                                                               | "Occupation\$"<br>"Employment"<br>"Underemployment"<br>"Unemployment"                                                                                 | "Ocupaç*"<br>"Profiss*"<br>"Desemprego"<br>"Emprego"                                                                                             |
|                    |                                       | Employment                    | Occupational status<br>Employment termination<br>Informal sector<br>Underemployment<br>Employment status<br>Child labor<br>Labor force |                                                                                                                                                       |                                                                                                                                                  |
|                    |                                       | Unemployment                  |                                                                                                                                        |                                                                                                                                                       |                                                                                                                                                  |
| G                  | Gender / sex                          | Gender Identities             | Sex role<br>Gender role<br>Man's role<br>Woman's role                                                                                  | "Gender inequalit*"<br>"Gender disparit*"<br>"Sex inequalit*"<br>"Sex disparit*"                                                                      | "Desigualdade\$ de género"<br>"Disparidade\$ de género"                                                                                          |
|                    |                                       | Sex                           | Phenotypic Sex<br>Genotypic Sex                                                                                                        |                                                                                                                                                       |                                                                                                                                                  |
| R                  | Religion                              | Religion                      | Religious Beliefs<br>Religious Ethics<br>Prayer                                                                                        | "Religio* discrimination"                                                                                                                             | "Discriminação relig*"                                                                                                                           |

|   |                      |                               |                                                                                              |                                                                                                                       |                                                                                                                                          |
|---|----------------------|-------------------------------|----------------------------------------------------------------------------------------------|-----------------------------------------------------------------------------------------------------------------------|------------------------------------------------------------------------------------------------------------------------------------------|
| E | Education            | Education                     | Workshop<br>Training Programs<br>Educational Activities<br>Literacy Programs                 | "Education* disparit**"<br>"Education* inequalit**"<br>"Illiteracy"<br>"Schooling"<br>"Grad**"                        | "Disparidade\$ educa**"<br>"Desigualdade\$ educa**"<br>"Iliteracia"<br>"Escolaridade"<br>"Nota\$"                                        |
|   |                      | Educational Status            | Educational Achievement<br>Illiteracy<br>Maternal Educational Status                         |                                                                                                                       |                                                                                                                                          |
| S | Socioeconomic status | Social Class                  | Socioeconomic Status<br>Middle Class Population<br>Caste                                     |                                                                                                                       |                                                                                                                                          |
|   |                      | Socioeconomic Factors         | Standard of Living<br>Living Standard<br>Land Tenure<br>High-Income Population<br>Inequality | "Social Class"<br>"Socioeconomic Status"<br>"Socioeconomic Factor\$"<br>"Standard\$ of Living"<br>"Living Standard\$" | "Classe\$ socia**"<br>"Estatuto socioeconómico"<br>"Fa\$tor* socioeconómico\$"<br>"Nive* de vida"<br>"Desigualdade**"<br>"Disparidade**" |
|   |                      | Health Status Disparities     |                                                                                              | "Inequalit**"<br>"Disparit**"                                                                                         | "Pobreza"                                                                                                                                |
|   |                      | Poverty                       | Indigent / Indigency<br>Low-Income Population                                                | "Poverty"                                                                                                             | "Rendimento\$"                                                                                                                           |
|   |                      | Income                        | Income Generation Programs<br>Savings<br>Income Distribution                                 | "Income\$"<br>"Remuneration"<br>"Salaries"                                                                            | "Remuneraç**"<br>"Salários\$"                                                                                                            |
|   |                      | Remuneration                  |                                                                                              | "Salary"                                                                                                              | "Mobilidade social"                                                                                                                      |
|   |                      | Salaries and Fringe Benefits  | Wage<br>Salary<br>Paternity Benefits<br>Pay Equity<br>Fringe Benefits                        | "Social mobility"<br>"Social determinant\$ of health"<br>"Deprivation"<br>"Marital status"                            | "Determinantes sociais da saúde"<br>"Deprivação"<br>"Estado civil"<br>"Afluência"<br>"Afluente\$"                                        |
|   |                      | Social mobility               |                                                                                              | "Affluen**"                                                                                                           | "Consumo"                                                                                                                                |
|   |                      | Social Hierarchy              |                                                                                              | "Consumption"                                                                                                         | "Bens"                                                                                                                                   |
|   |                      | Social determinants of health |                                                                                              | "Asset\$"                                                                                                             |                                                                                                                                          |
|   |                      | Psychosocial deprivation      |                                                                                              |                                                                                                                       |                                                                                                                                          |
|   |                      | Social stigma                 |                                                                                              |                                                                                                                       |                                                                                                                                          |
|   |                      | Marital status                |                                                                                              |                                                                                                                       |                                                                                                                                          |
| S | Social capital       | Social capital                |                                                                                              |                                                                                                                       |                                                                                                                                          |
|   |                      | Social conditions             | Living conditions                                                                            | "Social capital"                                                                                                      | "Capital social"                                                                                                                         |
|   |                      | Social environment            | Social ecology                                                                               | "Social condition\$"                                                                                                  | "Condiç* social**"                                                                                                                       |
|   |                      | Community Networks            | Community Care Networks<br>Community Health Networks                                         | "Living conditions"<br>"Social environment"                                                                           | "Condiç* de vida"<br>"Ambiente social"                                                                                                   |
|   |                      | Social support                | Social Network<br>Psychosocial Support Systems                                               | "Social support"                                                                                                      | "Apoio social"                                                                                                                           |
|   |                      | Social isolation              |                                                                                              | "Social network\$"                                                                                                    | "Rede\$ socia**"                                                                                                                         |
|   |                      | Loneliness                    |                                                                                              | "Social isolation"                                                                                                    | "Isolamento social"                                                                                                                      |
|   |                      | Social alienation             | Social Breakdown Syndrome                                                                    | "Social exclusion"                                                                                                    | "Exclusão social"                                                                                                                        |
|   |                      | Social marginalization        |                                                                                              |                                                                                                                       |                                                                                                                                          |
