# Supplementary material for: Connecting the dots on health inequalities – a systematic review on the social determinants of health in Portugal
Source: Springer Nature journal article supplement (doi:10.1186/s12939-016-0314-z), 2016-02-15
Supplement: MOESM2 [file 9762848]

## Additional File 2: Extracted data from eligible publications

| Reference               | Population                                                                                  | Variables                                                                                                                                                                             | Methods                 | Results                                                                                                                                                                                                                                                                                                                                                                                            | Strengths                                                                                      | Limitations                                           |
|-------------------------|---------------------------------------------------------------------------------------------|---------------------------------------------------------------------------------------------------------------------------------------------------------------------------------------|-------------------------|----------------------------------------------------------------------------------------------------------------------------------------------------------------------------------------------------------------------------------------------------------------------------------------------------------------------------------------------------------------------------------------------------|------------------------------------------------------------------------------------------------|-------------------------------------------------------|
| Alves et al, 2012       | Consecutive sample of 7,381 puerperae from public maternities, Porto (Generation XXI)       | Exposures: marital status, income, occupation, education and working conditions.<br>Outcomes: overweight/obesity, hypertension, dyslipidaemia and diabetes mellitus.<br>Control: age. | Logistic regression     | Being obese/overweight was strongly associated with being married, lower education, less differentiated occupations, being unemployed or a "housewife" and having a lower income. Hypertension was less likely in highly educated women and more likely in "housewives" relative to "employed". Diabetes was inversely associated with income. Dyslipidaemia was not related to any SES indicator. | Probability sampling, large sample size.                                                       | Most outcome were self-reported, cross sectional data |
| Amaral et al, 2013      | School-based sample of 6,899 adolescents, aged 12-18, Viseu                                 | Exposure: gender.<br>Outcome: insomnia.<br>Control: age.                                                                                                                              | Logistic regression     | Female gender was associated with insomnia symptoms in adolescents (OR=1.82; 95% CI=1.56-2.13).                                                                                                                                                                                                                                                                                                    | Large sample size.                                                                             | Use of a "convenience sample", cross sectional data   |
| Azevedo et al, 2012     | Random stratified sample of 5,094 adults, over 18                                           | Exposures: gender, marital status, occupation and education.<br>Outcome: chronic pain.<br>Control: age.                                                                               | Logistic regression     | Women were more likely to have chronic pain than men (OR=2.37, 95% CI=2.03-2.77). Unemployed (OR=1.64, 95% CI=1.14-2.38) and retired people (OR=1.67, 95% CI=1.28-2.17) were more likely to have chronic pain when compared to full time employees. Low educational level was associated with increased probability of chronic pain. Marital status was not associated with chronic pain.          | Large sample size, probability sampling.                                                       | Cross-sectional data.                                 |
| Bambra et al, 2009      | No mention of sample size for Portugal, adults over 16 (EUROTHINE/NHS)                      | Exposure: gender.<br>Outcome: SRH.<br>Control: age.                                                                                                                                   | Logistic regression     | Women had higher odds of reporting bad or very bad SRH (OR= 2.01, 95% CI=1.87-2.15).                                                                                                                                                                                                                                                                                                               | Probabilistic sampling procedure.                                                              | Cross-sectional data.                                 |
| Bastos et al, 2013      | Random sample of 2067 adults, over 18, Porto (EPIPorto cohort)                              | Exposures: education, neighbourhood deprivation, occupation and gender.<br>Outcome: H. pylori infection.<br>Control: age and gender.                                                  | Poisson regression      | Living in a deprived neighbourhood was associated with a higher prevalence of infection. The incidence rate of infection was lower among the more educated ( $\geq 10$ vs $\leq 9$ : risk ratio = 0.25, 95%CI: 0.06-0.96). No evidence of gender or occupational differences.                                                                                                                      | Probability sampling, considerable sample size, longitudinal data.                             | Possibility of selection bias follow-up.              |
| Bettencourt et al, 2013 | Sample of 600 consecutive hospital admissions due to acute heart failure, 6 month follow-up | Exposure: socioeconomic deprivation index (income, educational level and living alone).<br>Outcome: mortality.<br>Control: age, gender and admission brain natriuretic peptide.       | Cox regression analysis | Deprivation was not strongly associated with mortality (the hazard ratio of all-cause death was 1.48, 95% CI=0.77-2.82).                                                                                                                                                                                                                                                                           | Longitudinal data, adequate control for confounders.                                           | Used an uncommon SE measure, small sample size.       |
| Bingham et al, 2013     | Stratified random sample of 17,136 children, aged 3-10, mainland Portugal                   | Exposures: gender and parental education.<br>Outcome: overweight/obesity.<br>Control: age.                                                                                            | Logistic regression     | Low paternal education was strongly related to the odds of being overweight or obese, while low maternal education was only related to the odds of being obese. Girls had higher odds of both obesity and overweight.                                                                                                                                                                              | Trained technicians obtained anthropometric measures, probability sampling, large sample size. | Cross-sectional data, low response rate (57%).        |

|                          |                                                                                                |                                                                                                                                                                                                                                                              |                                                           |                                                                                                                                                                                                                                                                  |                                                                                      |                                                                             |
|--------------------------|------------------------------------------------------------------------------------------------|--------------------------------------------------------------------------------------------------------------------------------------------------------------------------------------------------------------------------------------------------------------|-----------------------------------------------------------|------------------------------------------------------------------------------------------------------------------------------------------------------------------------------------------------------------------------------------------------------------------|--------------------------------------------------------------------------------------|-----------------------------------------------------------------------------|
| Borrell et al, 2014      | 207 small areas from the Lisbon metropolitan area.                                             | Exposure: social deprivation (unemployment, manual workers, population aged 25–64 with primary education or lower, population aged 25–34 with a university degree and foreigners from low income countries).<br>Outcome: overall mortality.<br>Control: age. | Relative risks of smoothed standardized mortality ratios. | In women, mortality was higher in neighbourhoods with higher deprivation index, proportion of unemployed people and proportion of adults with primary education. In men, this association was only seen for unemployment.                                        | Objective health outcome.                                                            | Ecological design, low number of deaths can lead to low statistical power.  |
| Bulhões et al, 2013      | School based sample of 1,988 13 year-olds, Porto                                               | Exposures: gender and parental education.<br>Outcome: depressive symptoms.<br>Control: gender, parents' depression and education.                                                                                                                            | Logistic regression                                       | The prevalence of depressive symptoms was 18.8% in girls and 7.6% in boys ( $p < 0.001$ ). Parental education was not a determinant of depressive symptoms in either boys or girls.                                                                              | Outcome was assessed with a validated instrument.                                    | Cross-sectional data.                                                       |
| Camões et al, 2010       | Random sample of 1,621 adults, 18 and over, Porto (EPIPorto cohort)                            | Exposures: gender and education.<br>Outcomes: overall and central obesity.<br>Control: age, energy intake and leisure time physical activity.                                                                                                                | Poisson regression                                        | The incidence rate of central obesity was significantly higher in women (5.97, 95% CI: 5.09–7.03) when compared to men (2.38, 95% CI: 1.81–3.20). There was a significant inverse association between obesity and education in women.                            | Longitudinal design, probability sampling, outcomes assessed by trained researchers. | High loss to follow-up (66% were followed)                                  |
| Campos-Matos et al, 2014 | Sample of 712 health care workers from primary care centers                                    | Exposure: occupation.<br>Outcome: overweight/obesity.<br>Control: age and gender.                                                                                                                                                                            | ANCOVA                                                    | Health service personnel had more than 3 kg/m <sup>2</sup> higher BMI when compared to superior technicians. Nurses and doctors were not significantly different.                                                                                                | Outcome assessed by researchers.                                                     | Non-probabilistic sampling, cross sectional data, low response rate         |
| Carvalho et al, 2010     | Sample of 442 adults, 18 and over                                                              | Exposure: gender.<br>Outcome: sexual desire.<br>Control: age and education.                                                                                                                                                                                  | MANCOVA                                                   | Women reported significantly lower levels of sexual desire when compared to men.                                                                                                                                                                                 | Use of validated instruments to measure health outcomes.                             | Non-probabilistic sampling, cross sectional data                            |
| Carvalho et al, 2014     | Stratified school-based random sample of 17,911 adolescents, 10–17 years                       | Exposures: gender and perceptions of neighbourhood safety.<br>Outcome: emotional symptoms.<br>Control: school commitment, communication with family and school grades                                                                                        | Linear regression                                         | Female gender ( $\beta=0.16$ , $p=0.0001$ ) and higher perception of a safe neighbourhood ( $\beta=0.03$ , $p=0.024$ ) were associated with more emotional symptoms.                                                                                             | Large sample size, probability sampling.                                             | Not validated health measures, cross-sectional data.                        |
| Correia et al, 2014      | Consecutive sample of 7,472 puerperae from public maternities, over 18, Porto (Generation XXI) | Exposures: maternal education, occupation and income.<br>Outcome: impaired female fertility.<br>Control: previous pregnancy experience, age, pregnancy planning and behavioural characteristics                                                              | Logistic regression                                       | Lower education was associated with higher infertility among primigravidae but not in multigravidae. Occupation and income were not related to infertility.                                                                                                      | Probability sampling, large sample size.                                             | Excludes women who could not get pregnant, possibility of misclassification |
| Correia et al, 2015      | Sample of 6,893 adult mothers of singletons, Porto (Generation XXI)                            | Exposures: grandparents' education and social class, maternal education and marital status.<br>Outcome: small for gestational age.<br>Control: maternal age and gravidity.                                                                                   | Logistic regression                                       | Being small for gestational age was less likely in more educated (OR= 0.77, 95% CI=0.65–0.90) and in married women (OR=0.64, 95% CI = 0.47–0.86). No association was found between grandparents' education and social class and being small for gestational age. | Large sample size, high response rate.                                               | Possibility of recall bias, cross sectional data                            |
| Costa et al, 2008        | Random sample of 2,036 13 year olds, Porto (EPITeen)                                           | Exposure: parental education.<br>Outcome: eating disorders symptomatology.<br>Control: type of school, grade at school, age at menarche, BMI and depressive symptoms.                                                                                        | Linear regression                                         | Parental education had a significant positive effect on girls' drive for thinness and body dissatisfaction scores and a significant negative effect in boys' bulimia and body dissatisfaction scores.                                                            | Probability sampling, extensive control for confounders.                             | Possibility of selection bias (among schools and students).                 |

|                              |                                                                                               |                                                                                                                                                                                                                    |                     |                                                                                                                                                                                                                                                                                   |                                                                                                                                                 |                                                                                                                                                                   |
|------------------------------|-----------------------------------------------------------------------------------------------|--------------------------------------------------------------------------------------------------------------------------------------------------------------------------------------------------------------------|---------------------|-----------------------------------------------------------------------------------------------------------------------------------------------------------------------------------------------------------------------------------------------------------------------------------|-------------------------------------------------------------------------------------------------------------------------------------------------|-------------------------------------------------------------------------------------------------------------------------------------------------------------------|
| Dias et al, 2013             | Snowball sample of 1,375 adult immigrants, over 18, Lisbon                                    | Exposures: gender, nationality, education and perceived income.<br>Outcome: SRH.<br>Control: age, reported chronic disease, experienced mental illness, physical exercise and concern about eating habits.         | Logistic regression | Good SRH was reported by 66.7% of men and 56.6% of women ( $p < 0.001$ ). Good SRH was associated with African and Brazilian origin (compared to Eastern European) and secondary/higher education. Among women, good health was also associated with perceived sufficient income. | Extensive control for confounders.                                                                                                              | Cross-sectional data.                                                                                                                                             |
| Eikemo et al, 2008           | Random sample of 3,410 adults, 18 and over (ESS)                                              | Exposure: education.<br>Outcomes: SRH and limiting longstanding illness.<br>Control: age.                                                                                                                          | Rate differences    | All rate differences, for women, men, in SRH or limitations, were statistically significant, such that people with less education had worse health.                                                                                                                               | Large sample size, probability sampling.                                                                                                        | Cross-sectional data.                                                                                                                                             |
| Falcão et al, 2008           | Random sample of 1,911 13-year-old urban adolescents (EPITeen).                               | Exposure: gender and maternal education.<br>Outcomes: asthma and rhinitis.<br>Control: age.                                                                                                                        | Chi-square test     | Boys were more likely to have had a rhinitis diagnose (prevalence was 0.120 versus 0.092, $p=0.014$ ). There was no difference in asthma prevalence. There were no differences in asthma or rhinitis diagnosis regarding maternal education.                                      | Probabilistic sampling procedure and objective measurement of outcome.                                                                          | Possibility of selection bias (some schools refused to participate, so significant differences between students who participated and students with missing data). |
| Ferrão et al, 2013           | Sample of 2,690 children, aged 3-10, Porto                                                    | Exposure: parental perceptions of residential neighbourhood environments.<br>Outcome: obesity.<br>Control: age, gender, maternal education and school cluster.                                                     | Logistic regression | The odds of obesity were lower in neighbourhoods that were perceived as safe, pleasant and with well-maintained sidewalks.                                                                                                                                                        | Researchers took anthropometric measures, large sample size.                                                                                    | No information sampling procedures, cross-sectional data.                                                                                                         |
| Ferreira-Pinto et al, 2012   | Aggregated statistics on 278 counties based on approx. 200,000 hospital admissions            | Exposure: counties' economic development.<br>Outcome: mortality rates.<br>Control: age, gender and health care resources.                                                                                          | Linear regression   | Counties with higher economical development had significantly higher mortality rates (coefficient = 1.696, $p<0.001$ ).                                                                                                                                                           | Objective health outcome, considerable sample size.                                                                                             | Ecological design, cross-sectional data                                                                                                                           |
| Ferreira-Valente et al, 2014 | Sample of 324 patients with chronic musculoskeletal pain from health institutions, 18 or over | Exposure: social support.<br>Outcomes: pain intensity, physical functioning and psychological functioning.<br>Control: age and gender                                                                              | Linear regression   | Social support was associated with physical functioning and psychological functioning but not pain intensity.                                                                                                                                                                     | Use of validated instruments to measure the exposure and outcome.                                                                               | Non-probabilistic sampling, small sample size, cross-sectional data.                                                                                              |
| Fraga et al, 2015            | Random sample of 1205 adults aged 35-75, Porto (EPIPorto cohort)                              | Exposures: education and occupation.<br>Outcome: inflammatory markers.<br>Control: age, gender, marital status, current smoking, heavy drinking, inactivity, BMI, chronic disease and anti-inflammatory medication | Logistic regression | Both low education and undifferentiated occupation were associated with increased inflammatory markers.                                                                                                                                                                           | Large sample size, objective outcome measure, extensive control for confounders, data collection by trained interviewers, probability sampling. | Self-reported health behavior cut-offs used for health outcomes were dependent on the distribution in the population cross-sectional data.                        |

|                      |                                                                    |                                                                                                                                                                                                                                                                |                                                           |                                                                                                                                                                                                                                                                                                                                                                                                                                                                                                           |                                                                        |                                                                            |
|----------------------|--------------------------------------------------------------------|----------------------------------------------------------------------------------------------------------------------------------------------------------------------------------------------------------------------------------------------------------------|-----------------------------------------------------------|-----------------------------------------------------------------------------------------------------------------------------------------------------------------------------------------------------------------------------------------------------------------------------------------------------------------------------------------------------------------------------------------------------------------------------------------------------------------------------------------------------------|------------------------------------------------------------------------|----------------------------------------------------------------------------|
| Gotsens et al, 2013  | 207 small areas from the Lisbon metropolitan area.                 | Exposure: social deprivation (unemployment, manual workers, population aged 25–64 with primary education or lower, population aged 25–34 with a university degree and foreigners from low income countries).<br>Outcome: injury mortality.<br>Control: age.    | Relative risks of smoothed standardized mortality ratios. | There were higher mortality rates due to transport injuries, falls, homicides and all injuries in neighbourhoods with lower socioeconomic index for men. For women, suicide mortality was lower in neighbourhoods with higher social deprivation. There were no other important associations.                                                                                                                                                                                                             | Objective health outcome.                                              | Ecological design, low number of deaths can lead to low statistical power. |
| Goulão et al, 2015   | Spatial random sample of 1,736 migrants, Lisbon and Setúbal        | Exposures: nationality, gender, time in Portugal and marital status.<br>Outcome: BMI.<br>Control: gender, age, education, marital status and birthplace.                                                                                                       | Linear regression                                         | Being married was associated with higher BMI, when compared to being single ( $\beta=0.55$ , $p=0.019$ ). Immigrants from São Tomé e Príncipe had higher BMI when compared to Brazilians ( $\beta=1.21$ , $p=0.004$ ). Living in Portugal for 10-14 years ( $\beta=1.15$ , $p=0.004$ ) or over 15 years ( $\beta=1.48$ , $p<0.001$ ) was associated with higher BMI when compared to less than 5. Gender was not associated with BMI.                                                                     | High response rate (97,9%).                                            | Weight and height were self-reported, cross-sectional data                 |
| Harding et al, 2006a | All births in a year in a hospital, 4,227 newborns, Amadora-Sintra | Exposures: maternal migrant status, education and occupation.<br>Outcome: birth weight.<br>Control: maternal age, education, mode of delivery, smoking, parity, gestational age and child gender.                                                              | Linear regression                                         | Among babies of Portuguese white mothers, manual occupations were associated with lower birth weight. Maternal education was not associated with birth weight in any group. There were no significant differences in birth weights between different ethnic groups.                                                                                                                                                                                                                                       | Large sample size, controlled for most important possible confounders. | Use of hospital records, with considerable missing information.            |
| Harding et al, 2006b | All births registered in Portugal (1995 – 2002), 872,058 newborns  | Exposure: migration status.<br>Outcome: birth weight.<br>Control: year of birth, gender, maternal age, gestational age, and parity                                                                                                                             | Polytomous logistic regression                            | There was no difference in overall mean birth weights between Portuguese and African babies, but the percentage of small preterm births was higher among African (4.7%) than among Portuguese (2.9%) births.                                                                                                                                                                                                                                                                                              | Large sample size, analyses the whole population, not a sample.        | Exposure is nationality, not migration status                              |
| Harding et al, 2008  | Data from death registrations, 1998–2002, over 15,000 deaths.      | Exposures: migration, marital status and occupational class (for men).<br>Outcome: cardiovascular mortality.<br>Control: age.                                                                                                                                  | Death rates                                               | African migrants had higher mortality for all causes, circulatory disease, coronary heart disease and stroke. There was considerable heterogeneity among Africans with Cape Verdeans having higher mortality than Angolans or Mozambicans. Occupation was associated with heart disease mortality rate for African but not for Portuguese men. Married individuals had lower mortality.                                                                                                                   | Analysis of all deaths in the time period, large sample size.          | Change in ICD codes in the middle of the period analysed                   |
| Hoffman et al, 2014  | 207 small areas from the Lisbon metropolitan area.                 | Exposure: social deprivation (unemployment, manual workers, population aged 25–64 with primary education or lower, population aged 25–34 with a university degree and foreigners from low income countries).<br>Outcome: avoidable mortality.<br>Control: age. | Relative risks of smoothed standardized mortality ratios. | Deaths due to AIDS, cervical or uterine cancer, cerebro-vascular diseases and congenital heart diseases were higher in more deprived neighbourhoods. Mortality due to malignant colon illness was higher in less deprived neighbourhoods. There was no association between social deprivation and malignant diseases of the rectum, anal area or testes, or Hodgkin's disease, rheumatic heart disease, hypertension, heart failure, peptic ulcer, renal failure or conditions from the perinatal period. | Objective health outcome.                                              | Ecological design, low number of deaths can lead to low statistical power. |

|                               |                                                                                                  |                                                                                                                                                                                                                        |                               |                                                                                                                                                                                                                                                                                                                                |                                                             |                                                                      |
|-------------------------------|--------------------------------------------------------------------------------------------------|------------------------------------------------------------------------------------------------------------------------------------------------------------------------------------------------------------------------|-------------------------------|--------------------------------------------------------------------------------------------------------------------------------------------------------------------------------------------------------------------------------------------------------------------------------------------------------------------------------|-------------------------------------------------------------|----------------------------------------------------------------------|
| Humboldt et al, 2014          | Sample of 1,234 adults from life-long learning centers, over 75, Lisbon and the Algarve          | Exposures: gender, education, marital and professional status, income, urban-rural residence, religion and nationality.<br>Outcome: life satisfaction.<br>Control: age, recent disease, physical activity, medication. | Structural equation modelling | Having a religion ( $\beta=0.725$ ; $p<0.001$ ), higher income ( $\beta=0.551$ ; $p<0.001$ ), lower education ( $\beta=-0.403$ ; $p<0.001$ ) and living in a rural area ( $\beta=-0.292$ ; $p<0.001$ ) were associated with higher life satisfaction. Other SES variables were not significantly related to life satisfaction. | Adequate control for confounders.                           | Non-probabilistic sampling, cross-sectional data                     |
| Knesebeck et al, 2006         | Random sample of 1,312 adults, 25 or over (ESS)                                                  | Exposure: education.<br>Outcomes: SRH and functional limitations.<br>Control: age.                                                                                                                                     | Logistic regression           | Lower education was strongly associated with worse SRH and more functional limitations, both in women and in men.                                                                                                                                                                                                              | Probability sampling.                                       | Cross-sectional data.                                                |
| Lawlor et al, 2005            | School-based random sample of 1,153 children, aged 9 and 15, Madeira                             | Exposures: family income and parental education.<br>Outcome: insulin resistance.<br>Control: age, sex, parental BMI, birth weight, breast-feeding, height, pubertal stage, BMI and waist circumference.                | Linear regression             | Lower income and lower parental education were associated with lower insulin resistance.                                                                                                                                                                                                                                       | Probability sampling, extensive control for confounders.    | Income was not equalised for family size, cross-sectional data       |
| Leurent et al, 2013           | Consecutive sample of 1,005 adults, aged 18–75, from primary care, 6–12 months follow-up, Lisbon | Exposures: spiritual and religious beliefs.<br>Outcome: major depression.<br>Control: age, sex, education, employment, social support and past history of depression.                                                  | Logistic regression           | There were no significant differences in onset of major depression between religious (OR=1.78, 95% CI=0.39–8.08) or spiritual people (OR=1.52, 95% CI=0.27–8.48) when compared to neither religious nor spiritual.                                                                                                             | Longitudinal data.                                          | Unclear sampling methods and response rates                          |
| Machado-Rodrigues et al, 2011 | Sample of 362 adolescents, 13–16 years of age, midlands (MALS)                                   | Exposures: urban-rural residence and parental education.<br>Outcome: CRF.<br>Control: age, weight status and physical activity.                                                                                        | Logistic regression           | Adolescents of both sexes from rural settings were 76% more likely to be classified as aerobically fit compared to those from urban areas. Higher maternal education was also a predictor of better CRF in girls.                                                                                                              | Researchers assessed CRF, adequate control for confounders. | Cross-sectional data, small sample size.                             |
| Machado-Rodrigues et al, 2012 | School-based stratified random sample of 362 adolescents, aged 13–16, midlands                   | Exposure: urban-rural residence.<br>Outcomes: CRF and BMI.<br>Control: Age                                                                                                                                             | ANCOVA                        | CRF was better in both rural boys and girls. There were no statistically significant differences in BMI according to place of residence.                                                                                                                                                                                       | Researchers objectively assessed CRF and BMI.               | Cross-sectional data, small sample size.                             |
| Machado-Rodrigues et al, 2014 | Stratified random sample of 1,886 girls aged 7–9 years.                                          | Exposure: parental perceptions of neighbourhood environments.<br>Outcome: obesity and overweight.<br>Control: age, time spent in organized sports and parental education.                                              | Linear regression             | Neighbourhoods with interesting things to look at while walking were significantly associated with higher BMI (Beta =0.057, $p=0.02$ ), and neighbourhoods with many stores within easy walking distance were significantly associated with lower BMI (beta=-0.065, $p=0.01$ ).                                                | Weight and height were collected by trained researchers.    | Cross-sectional data.                                                |
| Malmusi, 2014                 | Stratified random sample of approximately 12,000 adults (EU-SILC)                                | Exposure: migrant status.<br>Outcome: SRH.<br>Control: age.                                                                                                                                                            | Poisson regression            | There were no differences in age-adjusted prevalence of poor health between migrants and natives, neither in women nor in men.                                                                                                                                                                                                 | Large sample size, probability sampling.                    | Cross-sectional data, little control for other possible confounders. |

|                            |                                                                                |                                                                                                                                                                                                                                                      |                                                           |                                                                                                                                                                                                                                                                                                                                                                                                                                                                                                                                                               |                                                               |                                                                             |
|----------------------------|--------------------------------------------------------------------------------|------------------------------------------------------------------------------------------------------------------------------------------------------------------------------------------------------------------------------------------------------|-----------------------------------------------------------|---------------------------------------------------------------------------------------------------------------------------------------------------------------------------------------------------------------------------------------------------------------------------------------------------------------------------------------------------------------------------------------------------------------------------------------------------------------------------------------------------------------------------------------------------------------|---------------------------------------------------------------|-----------------------------------------------------------------------------|
| Mari-Dell'Olmo et al, 2015 | 207 small areas from the Lisbon metropolitan area.                             | Exposure: social deprivation (unemployment, manual workers, population aged 25–64 with primary education or lower, population aged 25–34 with a university degree and foreigners from low income countries).<br>Outcome: mortality.<br>Control: age. | Relative risks of smoothed standardized mortality ratios. | In men, higher mortality in more deprived areas was found for respiratory diseases, chronic liver diseases, cerebrovascular diseases, influenza and pneumonia and diabetes. In women, the same relationship was found for ischemic heart disease, chronic liver disease, cerebrovascular disease and diabetes. An opposite association was found for lung cancer and breast cancer in women. No associations were found for ischemic heart disease, lung cancer or prostatic cancer in men and for respiratory diseases and influenza and pneumonia in women. | Objective health outcome.                                     | Ecological design, low number of deaths can lead to low statistical power.  |
| Martins et al, 2012        | Sample of 479 adults attending primary care in two metropolitan areas, over 50 | Exposures: gender and education.<br>Outcome: executive function.<br>Control: age.                                                                                                                                                                    | Linear regression                                         | Lower educational levels were significantly associated with worse executive function. Gender was associated with some, but not all tests, and the direction of this association depended on the test.                                                                                                                                                                                                                                                                                                                                                         | Assessment of outcome by trained researchers.                 | Possibility of selection bias, cross-sectional design.                      |
| Mastekaasa, 2014           | Random sample of adults, aged 20-59 (EULFS)                                    | Exposure: gender.<br>Outcome: sickness absence.<br>Control: age, living with partner, children, level of education, working hours, occupation and industry.                                                                                          | Poisson regression                                        | There were statistically significant gender gaps in sickness absence in Portugal, with OR that ranged from 1.27 to 2.22 in all the years analysed (women had higher odds).                                                                                                                                                                                                                                                                                                                                                                                    | Very high response rate (91%) for Portugal.                   | No information on sample size for Portugal, cross-sectional data            |
| Mello et al, 2008          | School-based sample of 700 13 year olds, Porto.                                | Exposures: type of school, maternal education and gender.<br>Outcome: dental caries.<br>Control: soft drinks consumption.                                                                                                                            | Logistic regression                                       | Attending a public school, being female and having parents with low educational attainment were identified as risk factors both for having dental caries and for having a high level of dental caries.                                                                                                                                                                                                                                                                                                                                                        | Caries registered by one trained dentist.                     | Cross-sectional data, non-probabilistic sampling.                           |
| Miranda et al, 2014        | 18 municipalities, Lisbon metropolitan area                                    | Exposures: illiteracy rate, deprivation, unemployment rate and proportion of precarious households.<br>Outcome: pre-term births.<br>Control: maternal age.                                                                                           | Relative risk & Moran's I                                 | There was a global significant association between the relative risk of preterm births and illiteracy rate (Moran's I=0.44), deprivation (Moran's I=0.32) and the unemployment rate (Moran's I=0.26). There was no association with precarious households.                                                                                                                                                                                                                                                                                                    | Adequate methods.                                             | Ecological design, cross-sectional data                                     |
| Neto, 2009                 | Sample of 1,055 adolescents (partially from ICSEY), Lisbon                     | Exposures: migration status and gender.<br>Outcome: mental health problems.<br>Control: age and SES.                                                                                                                                                 | ANCOVA                                                    | Adolescents from immigrant families reported fewer mental health problems than their native Portuguese counterparts, and girls reported more mental health problems than boys.                                                                                                                                                                                                                                                                                                                                                                                | Large array of instruments to measure mental health problems. | Cross-sectional data, non-probabilistic sampling.                           |
| Neto, 2010                 | Sample of 322 adolescents, aged 13-19, north of Portugal                       | Exposures: migration status and gender.<br>Outcomes: depression, anxiety and psychosomatic symptoms.<br>Control: age.                                                                                                                                | ANCOVA                                                    | Adolescents from immigrant families reported fewer mental health problems than Portuguese adolescents who have never migrated. There were no gender differences.                                                                                                                                                                                                                                                                                                                                                                                              | Use of a control group.                                       | Non-probabilistic sampling, small sample size, cross-sectional data.        |
| Nogueira et al, 2013a      | School-based sample of 1,885 children, 3–10 years, Coimbra                     | Exposure: parents' perceptions of social and built residential environment.<br>Outcome: obesity.<br>Control: age and parental education.                                                                                                             | Logistic regression                                       | Girls living in neighbourhoods perceived as having poorly built environmental conditions and as being unsafe had increased odds of being obese (OR= 1.47 and 1.34, respectively, p<0.005). These relationships were not evident for boys.                                                                                                                                                                                                                                                                                                                     | Researchers measured weight and height.                       | Recruitment at sampling procedures are not described, cross-sectional data. |

|                       |                                                                                                                             |                                                                                                                                                                                                        |                               |                                                                                                                                                                                                                                                                                                                                             |                                                                                  |                                                                                     |
|-----------------------|-----------------------------------------------------------------------------------------------------------------------------|--------------------------------------------------------------------------------------------------------------------------------------------------------------------------------------------------------|-------------------------------|---------------------------------------------------------------------------------------------------------------------------------------------------------------------------------------------------------------------------------------------------------------------------------------------------------------------------------------------|----------------------------------------------------------------------------------|-------------------------------------------------------------------------------------|
| Nogueira et al, 2013b | Sample of 1,885 Portuguese children, aged 3–10, Coimbra                                                                     | Exposure: parental education.<br>Outcome: obesity.<br>Control: gender, age and clustering of children in schools.                                                                                      | Logistic regression           | Children whose parents had low (OR = 51.76, 95% CI=1.25–1.99) and medium (OR=1.57, 95% CI=1.34–2.33) education were more likely to be obese than their high-education peers.                                                                                                                                                                | Large sample size.                                                               | No information selection or sampling procedures, cross-sectional data.              |
| Nunes et al, 2010     | Random sample of approximately 1,000 adults, aged 55-79, primary care registries, Northern Portugal                         | Exposures: urban-rural residence and education.<br>Outcomes: cognitive impairment and dementia.<br>Control: age, gender, vascular risk factors, cardiovascular disease, depression and other diseases. | Logistic regression           | Lower education was associated with cognitive impairment (OR = 1.54, 95% CI=1.02-2.33), whereas residence was not. There were no significant associations with dementia.                                                                                                                                                                    | Probabilistic sampling.                                                          | Cross-sectional data, high non response rate (48%).                                 |
| Oliveira et al, 2012  | Sample of 146 homeless adults, over 18, and matched controls (on sex, age and education) from the general population, Porto | Exposure: homelessness.<br>Outcomes: overweight/obesity, abdominal obesity, hypertension, dyslipidaemia and diabetes.<br>Control: age and education.                                                   | Poisson and linear regression | Overweight/obesity (prevalence ratio=0.66, 95% CI=0.45-0.95) and self-reported dyslipidaemia (prevalence ratio=0.21, 95% CI=0.10-0.43) were less common among homeless participants than in non-homeless. There were no differences in the other health outcomes.                                                                           | Some anthropometric measures taken by researchers, use of matched control group. | Most outcome are self-reported cross-sectional data.                                |
| Oliveira et al, 2015  | Sample of 96,905 hospital patients with hip fracture, 50 and over, within 278 municipalities of continental Portugal        | Exposure: municipal deprivation.<br>Outcome: hip fracture.<br>Control: age and gender.                                                                                                                 | Hierarchical regression model | In women, there was a lower risk associated with more affluent municipalities: relative risk=0.83 (95%CrI 0.65–1.00). In older ages ( $\geq 75$ years) affluent municipalities had higher risk of hip fracture.                                                                                                                             | Large sample size, use of multilevel data and methods.                           | Cross-sectional data.                                                               |
| Pereira et al, 2011   | Sample of 1,191 HIV-positive adults, over 18.                                                                               | Exposure: gender.<br>Outcome: quality of life.<br>Control: time since diagnosis, CD4 counts and HIV stage.                                                                                             | MANCOVA and linear regression | There was a significant effect of gender on quality of life, as women tended to report lower scores.                                                                                                                                                                                                                                        | Adequate control for potential confounders.                                      | Non-probabilistic sampling, cross sectional data                                    |
| Pereira et al, 2013   | Sample of 146 homeless adults, over 18, Porto                                                                               | Exposures: gender, education, nationality and duration of homelessness.<br>Outcome: oral caries.<br>Control: age.                                                                                      | Linear regression             | Having decayed teeth was significantly associated with nationality ('other' vs. 'Portuguese', $\beta = 2.7$ , 95% CI=0.4-5.2) and years of homelessness (' $\geq 6$ ' vs ' $\leq 1$ month', $\beta=2.8$ , 95% CI=0.4,5.2) but not associated with gender or education. Having missing teeth was not associated with any of these variables. | A single dentist assessed outcome.                                               | Cross-sectional data, not a probabilistic selection procedure.                      |
| Perelman et al, 2012  | Random sample of 33,662 adults, over 18 (NHS)                                                                               | Exposure: gender.<br>Outcomes: SRH, restricted-activity days, bed days and chronic diseases.<br>Control: age, education, employment status, income, insurance status, marital status, occupation.      | Logistic regression           | Women were more likely to have poor SRH, more days lost to disability, and 6 out of 8 chronic diseases. Men experienced more bed days.                                                                                                                                                                                                      | Probability sampling, large and representative sample.                           | Cross-sectional data and self-reported information on height and health conditions. |

|                       |                                                                                    |                                                                                                                                                                                                                                                                                                                  |                                                            |                                                                                                                                                                                                                                             |                                                                  |                                                                                                 |
|-----------------------|------------------------------------------------------------------------------------|------------------------------------------------------------------------------------------------------------------------------------------------------------------------------------------------------------------------------------------------------------------------------------------------------------------|------------------------------------------------------------|---------------------------------------------------------------------------------------------------------------------------------------------------------------------------------------------------------------------------------------------|------------------------------------------------------------------|-------------------------------------------------------------------------------------------------|
| Perelman, 2014        | Random sample of 28,433 adults, aged 25-79 (NHS)                                   | Exposure: height (as an indicator of early-life SES).<br>Outcomes: SRH and chronic diseases.<br>Control: age, gender, obesity, smoking, employment and education.                                                                                                                                                | Logistic regression                                        | Height was associated with the risk of several chronic diseases (asthma, chronic pain, cardiovascular disease, mental disease), but this association is largely mediated by education among men.                                            | Probability sampling, large and representative sample.           | Cross-sectional data and self-reported information on height and health conditions.             |
| Pimenta et al, 2011   | Sample of 243 women with vasomotor symptoms, aged 42-60, Lisbon                    | Exposures: marital status, professional status, income and education.<br>Outcomes: Hot flashes and night sweats.<br>Control: perceived control, age, parity, menopause, health care use, therapy for menopausal symptoms, psychological problems, alcohol and coffee intake, smoking, physical exercise and BMI. | Structural equation modelling                              | No SES variable showed any association with the health outcomes.                                                                                                                                                                            | Extensive control for potential confounders.                     | Recruitment and sampling procedures are not described, cross-sectional data, small sample size. |
| Ramos et al, 2007     | Random sample of 2,161 13-year-old urban adolescents (EPITeen).                    | Exposure: parental education.<br>Outcome: overweight.<br>Control: parental smoking and BMI, gender, family structure, school characteristics, birth weight, breastfeeding practice, age at menarche, sleep duration and leisure time activities.                                                                 | Logistic regression                                        | There was no statistical association between overweight children and parental education.                                                                                                                                                    | Weight and height were collected by trained researchers.         | Cross-sectional data.                                                                           |
| Ribeiro et al, 2014   | Sample of 97 centenarians, Porto and Beira Interior                                | Exposure: gender.<br>Outcome: anxiety symptoms.                                                                                                                                                                                                                                                                  | Logistic regression                                        | There was no difference in anxiety symptoms between men and women (OR=4.29, 95%CI=0.88–21.05)                                                                                                                                               | Use of validated instruments to measure outcome.                 | No information on selection or sampling procedures, cross-sectional data, small sample size.    |
| Rodrigues et al, 2008 | Sample of 1,822 consecutive births from public maternities.                        | Exposure: maternal employment.<br>Outcome: pre-term delivery.<br>Control: maternal age, marital status, education and obstetric characteristics.                                                                                                                                                                 | Logistic regression                                        | Women entering pregnancy while unemployed presented a significantly increased risk of spontaneous preterm delivery (OR=1.5, 95% CI=1.18–1.88).                                                                                              | Use of control group, controlled for most important confounders. | Possibility of bias due to health selection, non-probabilistic sampling.                        |
| Ruiz et al, 2015      | Consecutive sample of 8,330 births from public maternities, Porto (Generation XXI) | Exposure: maternal education.<br>Outcomes: pre-term birth and small for gestational age.<br>Control: child sex, maternal age and ethnicity.                                                                                                                                                                      | Relative index of inequality and slope index of inequality | There was no association between maternal education and pre-term birth. There was a significant association between maternal education and being small for gestational age (RII=1.29, 95% CI = 1.01;1.58 and SII=2.90, 95% CI = 0.20;5.60). | Probability sampling and large sample size.                      | Missing data were more common among mothers with low education – possibility of bias.           |
| Santana et al, 2014   | All diabetes deaths per municipality in Portugal, covering 278 municipalities.     | Exposure: index of sociomaterial deprivation (illiteracy, unemployment and housing without toilets).<br>Outcome: diabetes mortality.<br>Control: age and gender.                                                                                                                                                 | Bayesian hierarchical model                                | After the year 2000, the relative risk of death by Diabetes Mellitus according to vulnerability associated to social and economic conditions in the area of residence was not significant (relative risk: 1.00; IC95%: 0.98-1.02).          | Observes all population (all deaths), objective outcome.         | Ecological design, cross-sectional data.                                                        |
| Santos et al, 2003    | Random sample of 1,436 adults, aged 18–90, Porto                                   | Exposures: education, occupation and marital status.<br>Outcome: obesity.<br>Control: age, smoking status, physical activity and energy intake                                                                                                                                                                   | Logistic regression                                        | The prevalence of obesity was significantly higher in women (26.1%) than in men (13.9%). In women, the odds of obesity were higher in the less educated. In men, there was no association between obesity and any of the SES variables.     | Outcome was measured by researchers, probability sampling.       | Cross-sectional data.                                                                           |



|                           |                                                                                           |                                                                                                                                                                                                                   |                                                     |                                                                                                                                                                                                                                                  |                                                                                                        |                                                                     |
|---------------------------|-------------------------------------------------------------------------------------------|-------------------------------------------------------------------------------------------------------------------------------------------------------------------------------------------------------------------|-----------------------------------------------------|--------------------------------------------------------------------------------------------------------------------------------------------------------------------------------------------------------------------------------------------------|--------------------------------------------------------------------------------------------------------|---------------------------------------------------------------------|
| Santos et al, 2008        | Random sample of 1,962 adults over 40 years, Porto.                                       | Exposures: marital status, education, occupation and social class.<br>Outcome: metabolic syndrome.<br>Control: age, BMI, blood pressure, physical activity, alcohol consumption and smoking.                      | Logistic regression                                 | Among women, lower education, more differentiated occupation and lower social class, but not marital status, were associated with higher odds of metabolic syndrome. There were no significant associations among men.                           | Anthropometric measures were taken by trained researchers, probability sampling and large sample size. | Cross-sectional data.                                               |
| Santos et al, 2010        | Random sample of 1,093 adults, over 18, Porto (EPIPorto cohort).                          | Exposures: gender and education.<br>Outcome: metabolic syndrome.<br>Control: age, blood pressure, waist circumference, cholesterol, glucose and triglycerides.                                                    | Poisson regression                                  | Low education was associated with 1.53 higher odds of developing metabolic syndrome ( $p < 0.05$ ). There were no gender differences.                                                                                                            | Longitudinal data, extensive control for confounders, probability sampling.                            | High loss to follow-up (23%)                                        |
| Santos et al, 2011        | School based sample of 266 adolescents, aged 12-18, Lisbon.                               | Exposures: gender and ethnicity.<br>Outcome: CRF.<br>Control: age and percentage body fat.                                                                                                                        | Linear regression                                   | Interactions between age and ethnicity and between age and gender showed negative associations with CRF, such that Caucasian adolescents and girls had lower cardiorespiratory fitness.                                                          | Researchers objectively assessed CRF.                                                                  | Non-probabilistic sampling, cross sectional data, small sample size |
| Santos et al, 2014a       | Random sample of 1,051 adults, 50 and over, from health registries, Guimarães and Vizela. | Exposures: education and gender.<br>Outcomes: cognitive abilities and mood.<br>Control: age, physical activity, alcohol consumption, chronic diseases and BMI.                                                    | Linear regression and structural equation modelling | Gender showed different associations with cognitive ability, depending on the test used. Women tended to show more depressive mood. Education was positively associated with cognitive ability.                                                  | Probability sampling, measures are confirmed by medical records.                                       | Cross-sectional data.                                               |
| Santos et al, 2014b       | School-based sample of 517 adolescents, aged 15-18, Azores                                | Exposure: parental education.<br>Outcomes: body fat, systolic blood pressure, triglycerides, cholesterol, insulin resistance and metabolic risk score.<br>Control: age and gender.                                | Z-scores                                            | Systolic blood pressure and metabolic risk score were higher in adolescents whose parents had lower education. The other outcomes were not associated with parental education.                                                                   | Outcomes were objectively tested.                                                                      | Cross-sectional data.                                               |
| Schutte et al, 2013       | Stratified random sample of approximately 1,000 adults (EQLS)                             | Exposure: education.<br>Outcome: SRH.<br>Control: age, marital status and urbanization.                                                                                                                           | RII                                                 | Only women showed significant education-related inequality in SRH (RII for men = 1.4 (0.3, 3.3) and women = 5.9 (2.6, 13.4)).                                                                                                                    | Adequate methods.                                                                                      | Cross-sectional data.                                               |
| Silva, 2014               | Randomized stratified sample of 1,000 adults over 50, continental Portugal                | Exposures: gender, occupation, employment, income, education, individual social capital indicators (characterization of social network, characterization of social activities).<br>Outcome: SRH.<br>Control: age. | Linear regression                                   | Being male, with more education, more differentiated occupation, employed, with higher income and higher number of activities outside the home were all associated with better SRH. Other social capital indicators had no association with SRH. | Probability sampling, extensive control for potential confounders.                                     | SRH was analysed as a continuous measure, cross sectional data      |
| Sousa-Ribeiro et al, 2014 | Sample of 300 adults aged between 40 and 65, Porto.                                       | Exposure: employment.<br>Outcome: psychological well-being.<br>Control: gender, parental status, civil status and education.                                                                                      | MANOVA                                              | The employed reported better well-being than the other groups, and the unemployed in training showed lower distress than those who were not.                                                                                                     | Used validated instruments to measure the health outcome.                                              | Use of a "convenience sample".                                      |
| Stewart-Knox et al, 2012  | Stratified cluster sample of 540 adults, aged 43-93                                       | Exposures: employment, gender and education.<br>Outcomes: waist circumference and BMI.<br>Control: dietary habits, physical activity, resilience, mood, hopelessness, perceived stress and life events.           | Linear regression                                   | BMI was not predicted by any SES variable. Being male, not working and having lower education were associated with higher waist circumference.                                                                                                   | Researchers took anthropometric measures, probability sampling.                                        | Cross sectional data.                                               |

|                        |                                                                 |                                                                                                                                                                                           |             |                                                                                                                                                                                                               |                                                                                                    |                                                    |
|------------------------|-----------------------------------------------------------------|-------------------------------------------------------------------------------------------------------------------------------------------------------------------------------------------|-------------|---------------------------------------------------------------------------------------------------------------------------------------------------------------------------------------------------------------|----------------------------------------------------------------------------------------------------|----------------------------------------------------|
| Vilhena et al, 2014    | Sample of 774 chronic disease patients, over 17, from hospitals | Exposures: spirituality and social support. Outcomes: quality of life and subjective well-being. Control: gender, education, age, time since diagnosis and severity of disease perception | MANCOVA     | Spirituality and social support were significant predictors of quality of life and subjective well-being.                                                                                                     | Used validated instruments to measure health outcome, extensive control for potential confounders. | Unclear sampling procedures, cross-sectional data. |
| Williamson et al, 2009 | All death registrations, 1998–2002, over 5,000 deaths.          | Exposures: migration status, gender, marital status and occupational class (for men). Outcome: infectious disease mortality. Control: age.                                                | Death rates | Compared with people born in Portugal, African migrants had higher mortality for infectious diseases including AIDS. Death rates were higher among unmarried people and men from manual occupational classes. | Objective health outcome, analysis of all deaths in the time period.                               | Change in ICD codes in the middle of the period.   |

Legend:

AMI Acute Myocardial Infarction. ANCOVA Analysis of Covariance. CI Confidence Interval. COPD Chronic Obstructive Pulmonary Disease. CRF Cardiorespiratory Fitness. BMI Body Mass Index. CrI Credible Interval. EPITeen Epidemiological Health Investigation of Teenagers in Porto. EQLS European Quality of Life Survey. ESS European Social Survey. EU-SILC European Union Survey on Income and Living Conditions. EULFS European Union Labour Force Survey. EUROTHINE Health Inequalities in Europe. ICD International Classification of Diseases. ICSEY International Comparative Study of Ethnocultural Youth. MALS Midlands Adolescent Lifestyle Study. MANCOVA Multivariate Analysis of Covariance. NHS National Health Survey. RII Relative Index of Inequality. SES Socioeconomic Status. SRH Self Rated Health.
