# Supplementary material for: Connecting the dots on health inequalities – a systematic review on the social determinants of health in Portugal
Source: Springer Nature journal article supplement (doi:10.1186/s12939-016-0314-z), 2016-02-15
Supplement: MOESM4 [file 9762848]

#### Additional file 4: References of eligible publications.

- Alves E, Correia S, Barros H, Azevedo A. Prevalence of self-reported cardiovascular risk factors in Portuguese women: a survey after delivery. *International journal of public health*. 2012;57(5):837-47.
- Amaral MOP, Pereira CMF, Martins DIS, Sakellarides CT. Prevalence and risk factors for insomnia among Portuguese adolescents. *European journal of pediatrics*. 2013;172(10):1305-11.
- Azevedo LF, Costa-Pereira A, Mendonça L, Dias CC, Castro-Lopes JM. Epidemiology of chronic pain: a population-based nationwide study on its prevalence, characteristics and associated disability in Portugal. *The journal of pain*. 2012;13(8):773-83.
- Bambra C, Pope D, Swami V, Stanistreet D, Roskam A, Kunst A, et al. Gender, health inequalities and welfare state regimes: a cross-national study of 13 European countries. *Journal of Epidemiology and Community Health*. 2009;63(1):38-44.
- Bastos J, Peleteiro B, Barros R, Alves L, Severo M, Fátima Pina M, et al. Sociodemographic determinants of prevalence and incidence of *Helicobacter pylori* infection in Portuguese adults. *Helicobacter*. 2013;18(6):413-22.
- Bettencourt P, Lourenço P, Azevedo A. Influence of socioeconomic status on therapy and prognosis after an acute heart failure episode. *International journal of cardiology*. 2013;168(5): 4985-4987.
- Bingham DD, Varela-Silva MI, Ferrão MM, Augusta G, Mourão MI, Nogueira H, et al. Socio-demographic and behavioral risk factors associated with the high prevalence of overweight and obesity in portuguese children. *American Journal of Human Biology*. 2013;25(6):733-42.
- Borrell C, Marí-Dell'olmo M, Palència L, Gotsens M, Burström BO, Domínguez-Berjón F, et al. Socioeconomic inequalities in mortality in 16 European cities. *Scandinavian journal of public health*. 2014;42(3): 245-254.
- Bulhões C, Ramos E, Lindert J, Dias S, Barros H. Depressive symptoms and its associated factors in 13-year-old urban adolescents. *International journal of environmental research and public health*. 2013;10(10):5026-38.
- Camões M, Lopes C, Oliveira A, Santos AC, Barros H. Overall and central obesity incidence in an urban Portuguese population. *Preventive medicine*. 2010;50(1):50-5.
- Campos-Matos I, Peralta-Santos A, Gomes B, Borges G, Aguiar P. Body Mass Index Assessment of Health Care Professionals in a Primary Care Setting in Portugal: a Cross Sectional Study. *Acta Médica Portuguesa*. 2014;27(5):609-614.
- Carvalho J, Nobre P. Gender issues and sexual desire: The role of emotional and relationship variables. *The journal of sexual medicine*. 2010;7(7):2469-78.
- Carvalho M, Matos MG. Psychosocial Determinants of Mental Health and Risk Behaviours in Adolescents. *Global journal of health science*. 2014;6(4):p22.
- Correia S, Rodrigues T, Barros H. Socioeconomic variations in female fertility impairment: a study in a cohort of Portuguese mothers. *BMJ open*. 2014;4(1):e003985.
- Correia S, Barros H. Small-for-gestational age Portuguese babies: the effect of childhood social environment, growth and adult socioeconomic conditions. *Preventive medicine*. 2015;70:102-7.
- Costa C, Ramos E, Severo M, Barros H, Lopes C. Determinants of eating disorders symptomatology in Portuguese adolescents. *Archives of pediatrics & adolescent medicine*. 2008;162(12):1126-32.
- Dias S, Gama A, Martins MO. Health status and preventative behaviors of immigrants by gender and origin: A Portuguese cross-sectional study. *Nursing & health sciences*. 2013;15(3):309-17.
- Eikemo TA, Huisman M, Bambra C, Kunst AE. Health inequalities according to educational level in different welfare regimes: a comparison of 23 European countries. *Sociology of health & illness*. 2008;30(4):565-82.
- Falcão H, Ramos E, Marques A, Barros H. Prevalence of asthma and rhinitis in 13 year old adolescents in Porto, Portugal. *Revista Portuguesa de Pneumologia (English Edition)*. 2008;14(6):747-768.
- Ferrão MM, Gama A, Marques VR, Mendes LL, Mourão I, Nogueira H, Velásquez-Melendez G, Padez C. Association between parental perceptions of residential

neighbourhood environments and childhood obesity in Porto, Portugal. *European journal of public health*. 2013;23(6):1027-1031.

Ferreira-Pinto LM, Rocha-Gonçalves F, Teixeira-Pinto A. An ecological study on the geographic patterns of ischaemic heart disease in Portugal and its association with demography, economic factors and health resources distribution. *BMJ open*. 2012;2(4):e000595.

Ferreira-Valente MA, Pais-Ribeiro JL, Jensen MP. Associations between psychosocial factors and pain intensity, physical functioning, and psychological functioning in patients with chronic pain: A cross-cultural comparison. *The Clinical journal of pain*. 2014;30(8):713-23.

Fraga S, Marques-Vidal P, Vollenweider P, Waeber G, Guessous I, Paccaud F, et al. Association of socioeconomic status with inflammatory markers: A two cohort comparison. *Preventive medicine*. 2015;71:12-19.

Gotsens M, Marí-Dell'Olmo M, Pérez K, Palència L, Martínez-Beneito MA, Rodríguez-Sanz M, Burström B et al. Socioeconomic inequalities in injury mortality in small areas of 15 European cities. *Health & place*. 2013;24:165-172.

Goulão B, Santos O, Alarcão V, Portugal R, Carreira M, do Carmo I. Prevalência de excesso de peso nos imigrantes brasileiros e africanos residentes em Portugal. *Revista Portuguesa de Saúde Pública*. 2015;33(1):24-32.

Harding S, Santana P, Cruickshank JK, Boroujerdi M. Birth weights of black African babies of migrant and nonmigrant mothers compared with those of babies of European mothers in Portugal. *Annals of epidemiology*. 2006a;16(7):572-9.

Harding S, Boroujerdi M, Santana P, Cruickshank J. Decline in, and lack of difference between, average birth weights among African and Portuguese babies in Portugal. *International journal of epidemiology*. 2006b;35(2):270-6.

Harding S, Teyhan A, Rosato M, Santana P. All cause and cardiovascular mortality in African migrants living in Portugal: evidence of large social inequalities. *European Journal of Cardiovascular Prevention & Rehabilitation*. 2008;15(6):670-6.

Hoffmann R, Borsboom G, Saez M, Dell'Olmo MM, Burstrom B, Corman D, et al. Social differences in avoidable mortality between small areas of 15 European cities: an ecological study. *Int J Health Geogr*. 2014;13(8).

Humboldt S, Leal I, Pimenta F. Living Well in Later Life: The Influence of Sense of Coherence, and Socio-Demographic, Lifestyle and Health-Related Factors on Older Adults' Satisfaction with Life. *Applied Research in Quality of Life*. 2014;9(3):631-42.

Knesebeck O, Verde PE, Dragano N. Education and health in 22 European countries. *Social science & medicine*. 2006;63(5):1344-51.

Lawlor DA, Harro M, Wedderkopp N, Andersen LB, Sardinha LB, Riddoch CJ, et al. Association of socioeconomic position with insulin resistance among children from Denmark, Estonia, and Portugal: cross sectional study. *BMJ*. 2005;331(7510):183.

Leurent B, Nazareth I, Bellón-Saameño J, Geerlings MI, Maarros H, Saldivia S et al. Spiritual and religious beliefs as risk factors for the onset of major depression: an international cohort study. *Psychological medicine*. 2013;43(10):2109-2120.

Machado-Rodrigues AM, Coelho-e-Silva MJ, Mota J, Cumming SP, Riddoch C, Malina RM. Correlates of aerobic fitness in urban and rural Portuguese adolescents. *Annals of human biology*. 2011;38(4):479-484.

Machado-Rodrigues AM, Coelho-E-Silva MJ, Mota J, Padez C, Martins RA, Cumming SP et al. Urban-rural contrasts in fitness, physical activity, and sedentary behaviour in adolescents. *Health promotion international*. 2012;29(1):118-29.

Machado-Rodrigues AM, Santana A, Gama A, Mourão I, Nogueira H, Rosado V, Padez C. Parental perceptions of neighborhood environments, BMI, and active behaviors in girls aged 7-9 years. *American Journal of Human Biology*. 2014; 26(5):670-675.

Malmusi D. (2014). Immigrants' health and health inequality by type of integration policies in European countries. *The European Journal of Public Health*. 2014;25(2):293-9.

Marí-Dell'Olmo M, Gotsens M, Palència L, Burström B, Corman D, Costa G et al. Socioeconomic inequalities in cause-specific mortality in 15 European cities. *Journal of epidemiology and community health*. 2015;69(5):432-441.

- Martins IP, Maruta C, Freitas V, Mares I. Executive performance in older Portuguese adults with low education. *The Clinical Neuropsychologist*. 2013;27(3):410-425.
- Mastekaasa A. The gender gap in sickness absence: long-term trends in eight European countries. *The European Journal of Public Health*. 2014;cku075.
- Mello T, Antunes I, Waldman E, Ramos E, Relvas M, Barros H. Prevalence and severity of dental caries in schoolchildren of Porto, Portugal. *Community dental health*. 2008;25(2):119-25.
- Miranda MJ, Costa C, Santana P, Barrozo LV. Associação espacial entre variáveis socioeconômicas e risco relativo de nascimentos pré-termo na Região Metropolitana de São Paulo (RMSP) e na Área Metropolitana de Lisboa (AML). *Saúde Soc*. 2014;23(4):1142-53.
- Neto F. Predictors of mental health among adolescents from immigrant families in Portugal. *Journal of Family Psychology*. 2009;23(3):375.
- Neto F. Mental health among adolescents from returned Portuguese immigrant families from North America. *North American Journal of Psychology*. 2010;12(2):265.
- Nogueira H, Ferrão M, Gama A, Mourão I, Marques VR, Padez C. Perceptions of neighborhood environments and childhood obesity: evidence of harmful gender inequities among Portuguese children. *Health & place*. 2013a;19:69-73.
- Nogueira H, Gama A, Mourao I, Marques V, Ferrão M, Padez C. The associations of SES, obesity, sport activity, and perceived neighborhood environments: Is there a model of environmental injustice penalizing portuguese children? *American journal of human biology*. 2013b;25(3):434-436.
- Nunes B, Silva RD, Cruz VT, Roriz JM, Pais J, Silva MC. Prevalence and pattern of cognitive impairment in rural and urban populations from Northern Portugal. *BMC neurology*. 2013;10(1):42.
- Oliveira LDP, Pereira ML, Azevedo A, Lunet N. Risk factors for cardiovascular disease among the homeless and in the general population of the city of Porto, Portugal. *Cadernos de Saúde Pública*. 2012;28(8):1517-1529.
- Oliveira C, Economou T, Bailey T, Mendonça D, Pina M. The interactions between municipal socioeconomic status and age on hip fracture risk. *Osteoporosis International*. 2015;26(2):489-98.
- Pereira M, Canavarró MC. Gender and age differences in quality of life and the impact of psychopathological symptoms among HIV-infected patients. *AIDS and Behavior*. 2011;15(8):1857-69.
- Pereira M, Oliveira L, Lunet N. Caries and oral health related behaviours among homeless adults from Porto, Portugal. *Oral health & preventive dentistry*. 2013;12(2):109-116.
- Perelman J, Fernandes A, Mateus C. Gender disparities in health and healthcare: results from the Portuguese National Health Interview Survey. *Cadernos de saúde publica*. 2012;28(12):2339-48.
- Perelman J. Are chronic diseases related to height? Results from the Portuguese National Health Interview Survey. *Economics & Human Biology*. 2014;15:56-66.
- Pimenta F, Leal I, Maroco J, Ramos C. Perceived control, lifestyle, health, socio-demographic factors and menopause: Impact on hot flashes and night sweats. *Maturitas*. 2011;69(4):338-42.
- Ramos, E, Barros H. Family and school determinants of overweight in 13-year-old Portuguese adolescents. *Acta Paediatrica*. 2007;96(2): 281-286.
- Ribeiro O, Teixeira L, Araújo L, Afonso RM, Pachana N. Predictors of anxiety in centenarians: health, economic factors, and loneliness. *International Psychogeriatrics*. 2014:1-10.
- Rodrigues T, Barros H. Maternal unemployment: an indicator of spontaneous preterm delivery risk. *European journal of epidemiology*. 2008;23(10):689-693.
- Ruiz M, Goldblatt P, Morrison J, Kukla L, Švancara J, Riitta-Järvelin M et al. Mother's education and the risk of preterm and small for gestational age birth: a DRIVERS meta-analysis of 12 European cohorts. *Journal of epidemiology and community health*. 2015 jech-2014.

- Santana P, Costa C, Loureiro A, Raposo J, Boavida JM. Geografias da diabetes mellitus em Portugal: como as condições do contexto influenciam o risco de morrer. *Acta Med Port.* 2014;27(3):309-17.
- Santos AC, Barros H. Prevalence and determinants of obesity in an urban sample of Portuguese adults. *Public Health.* 2003;117(6):430-7.
- Santos AC, Ebrahim S, Barros H. Gender, socio-economic status and metabolic syndrome in middle-aged and old adults. *BMC Public Health.* 2008;8(1):62.
- Santos AC, Severo M, Barros H. Incidence and risk factors for the metabolic syndrome in an urban South European population. *Preventive medicine.* 2010;50(3):99-105.
- Santos DA, Silva AM, Santa-Clara H, Matias CN, Fields DA, Sardinha LB. Determinant factors of cardiorespiratory fitness in Portuguese adolescents of different ethnicities. *Revista Brasileira de Cineantropometria & Desempenho Humano.* 2011;13(4):243-9.
- Santos NC, Costa PS, Cunha P, Portugal-Nunes C, Amorim L, Cotter J et al. Clinical, physical and lifestyle variables and relationship with cognition and mood in aging: a cross-sectional analysis of distinct educational groups. *Frontiers in aging neuroscience.* 2014a;6:21.
- Santos R, Moreira C, Abreu S, Lopes L, Ruiz JR, Moreira P et al. Parental Education Level Is Associated With Clustering of Metabolic Risk Factors in Adolescents Independently of Cardiorespiratory Fitness, Adherence to the Mediterranean Diet, or Pubertal Stage. *Pediatric cardiology.* 2014b;35(6):959-964.
- Schütte S, Chastang JF, Parent-Thirion A, Vermeulen G, Niedhammer I. Social differences in self-reported health among men and women in 31 countries in Europe. *Scandinavian journal of public health.* 2013;41(1):51-57.
- Silva PA. Individual and social determinants of self-rated health and well-being in the elderly population of Portugal. *Cadernos de saude publica.* 2014;30(11):2387-400.
- Sousa-Ribeiro M, Sverke M, Coimbra JL. Perceived quality of the psychosocial environment and well-being in employed and unemployed older adults: the importance of latent benefits and environmental vitamins. *Economic and Industrial Democracy.* 2014;35(4):629-52.
- Stewart-Knox B, Duffy ME, Bunting B, Parr H, de Almeida MDV, Gibney M. Associations between obesity (BMI and waist circumference) and socio-demographic factors, physical activity, dietary habits, life events, resilience, mood, perceived stress and hopelessness in healthy older Europeans. *BMC public health.* 2012;12(1):424.
- Vilhena E, Pais-Ribeiro J, Silva I, Pedro L, Meneses RF, Cardoso H et al. Psychosocial factors as predictors of quality of life in chronic portuguese patients. *Health Qual Life Outcomes.* 2014;12(1):3.
- Williamson LM, Rosato M, Teyhan A, Santana P, Harding S. AIDS mortality in African migrants living in Portugal: evidence of large social inequalities. *Sexually transmitted infections.* 2009;85(6):427-31.
